# Supplementary material
Source: Springer Nature journal article supplement (https://www.springerprofessional.de/resource/supplementary/40095_2011_8_MOESM11_ESM.pdf/11899688)

**3932 m<sup>3</sup> Pumped  
Storage Reservoir**

OF WAR HILL

**150 kW Pumping and  
Generating Station**

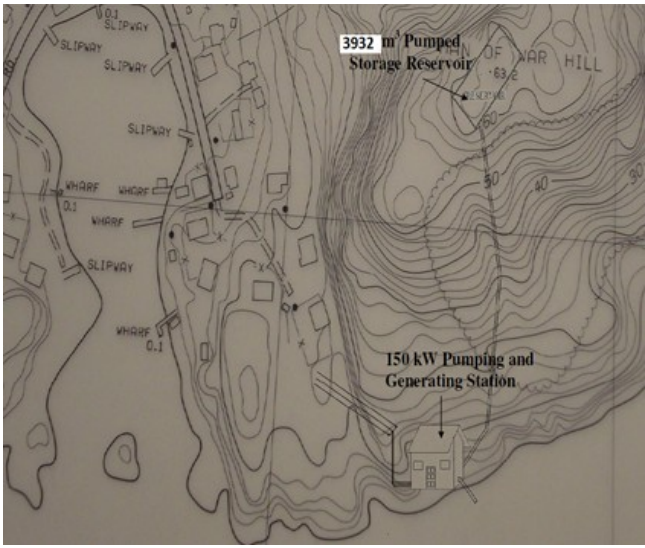

Supplement: MOESM11 [file 11899688]
